# Supplementary material for: Nitrogen-doped photoluminescent carbon nanospheres: green, simple synthesis via hair and application as a sensor for Hg2+ions
Source: Royal Society of Chemistry journal article supplement (doi:10.1039/c4ra04209c), 2014-08-12
Supplement: c4ra04209c1.pdf [file c4ra04209c1.pdf]

Electronic Supplementary Information

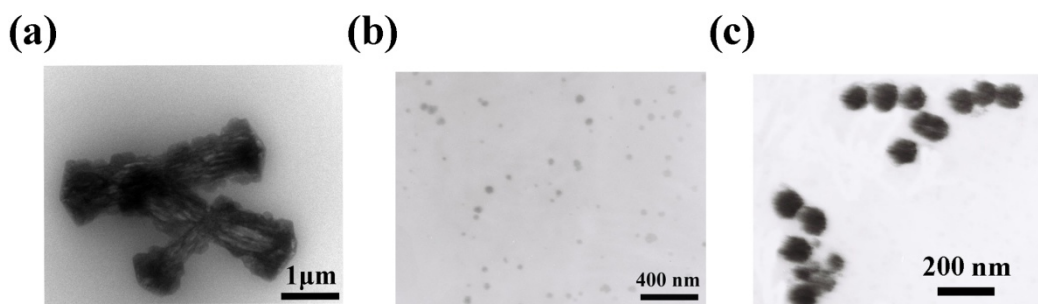

**Fig.1S** TEM images of CNSs under different reaction time (a) 2 h, (b) 6 h, and (c) 24 h.

5 **Table S1** The relationship between quantum yield of CNSs and the reaction temperature.

| Reaction temperature (°C) | Quantum yield (%) |
|---------------------------|-------------------|
| 180                       | 16.5              |
| 200                       | 24.8              |
| 220                       | 15.2              |
| 240                       | 10.4              |
